# Supplementary material for: A hybrid-type Li–air battery based on a polypyrrole/carbon nanocomposite catalyst as the cathode
Source: Royal Society of Chemistry journal article supplement (doi:10.1039/c6nj03402k), 2016-12-26
Supplement: c6nj03402k1.pdf [file c6nj03402k1.pdf]

## **Hybrid-type Li-air battery based on a polypyrrole/carbon nanocomposite catalyst as a cathode.**

Kyoung-ho Kim<sup>a\*</sup> and Wang-Geun Lee<sup>b</sup>

<sup>a</sup> *Department of Solar & Energy Engineering, College of Science & Engineering, Cheongju University, 298, Daeseong-ro, Cheongwon-gu, Chungcheongbuk-do, 28503, Republic of Korea.*

<sup>b</sup> *Center for Superfunctional Materials, Dept. of Chemistry, School of Natural Science, Ulsan National Institute of Science and Technology (UNIST), UNIST-gil 50, Ulsan, 689-798, Republic of Korea.*

\* Corresponding authors.

E-mail addresses: [khkimecl@cju.ac.kr](mailto:khkimecl@cju.ac.kr) (KKim)

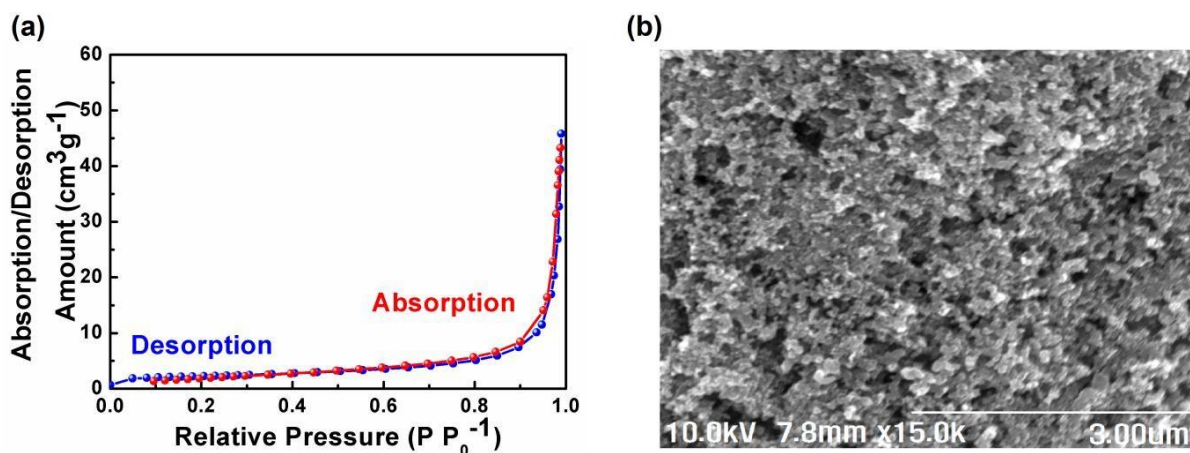

**Figure S1.** Surface area, surface morphology analysis of the Vulcan carbon black (Vulcan XC 72R); (a) N<sub>2</sub> adsorption-desorption measurements plot by use of BET calculation method, (b) SEM image.

**Table S1.** N<sub>2</sub> adsorption-desorption measurement data by use of BET calculation method.

|                                                                                  | PPyC nano composite | Vulcan carbon black |
|----------------------------------------------------------------------------------|---------------------|---------------------|
| Surface Area<br>(m <sup>2</sup> g <sup>-1</sup> )                                | 807.37              | 250.12              |
| Total pore volume<br>(P/P <sub>0</sub> =0.990, cm <sup>3</sup> g <sup>-1</sup> ) | 2.6727              | 2.3067              |
| Average pore diameter<br>(nm)                                                    | 13.242              | 37.009              |

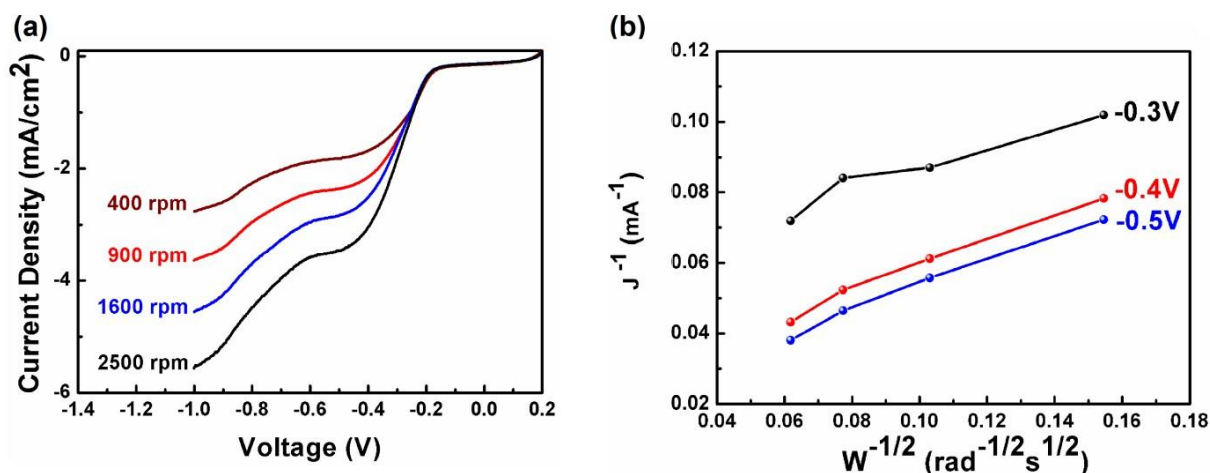

**Figure S2.** (a) Linear sweep voltammetry (LSV) plot of the Vulcan carbon black (Vulcan XC 72R, fuel cell store, Inc.) at different rotating speeds from 400 rpm to 2500 rpm by use of a rotating disk electrode measurements with Pt wire and Hg/HgO as a counter electrode and a reference electrode, respectively, in O<sub>2</sub> saturated 0.1M LiOH solution and (b) The corresponding Koutecky-Levich Plots at different potentials from -0.3 V to -0.5 V.

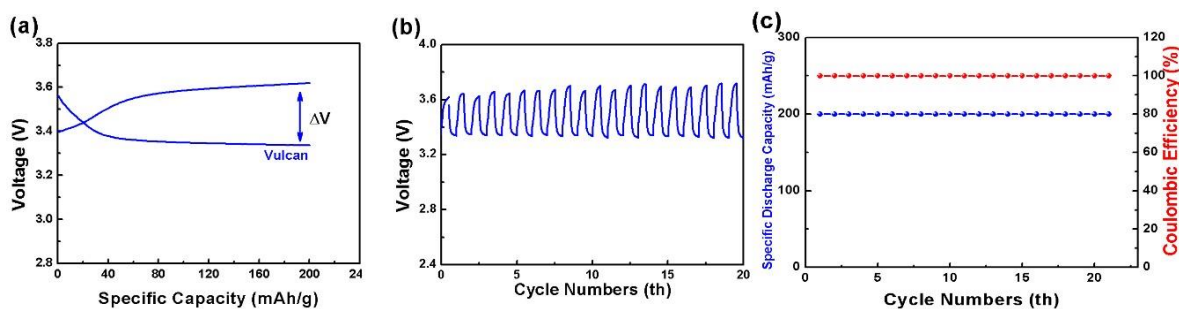

**Figure S3.** Electrochemical performance of the hybrid type Li-air batteries with the Vulcan carbon black (Vulcan XC 72R) and Li-metal as a cathode and an anode, respectively; (a) Galvanostatic charge-discharge graph at 1<sup>st</sup> cycle, (b) Cyclic performance graph during 20 cycles, and (c) specific discharge capacities and coulombic efficiencies during 20 cycles.
